# Supplementary material for: Fabrication of a honeycomb-like bimetallic SERS substrate for the detection of triphenyltin chloride
Source: Royal Society of Chemistry journal article supplement (doi:10.1039/d1an01359a), 2021-01-01
Supplement: d1an01359a1.pdf [file d1an01359a1.pdf]

## Electronic Supplementary Information

### Fabrication of a honeycomb-like bimetallic SERS substrate for detection of triphenyltin chloride

Shan Jiang,<sup>a, b</sup> Lin Chang,<sup>a, b</sup> Jie Luo,<sup>c</sup> Jianfa Zhang,<sup>c</sup> Xiaohong Liu,<sup>a</sup> Chong-Yew

Lee,<sup>d</sup> and Wei Zhang<sup>\*a, b</sup>

<sup>a</sup> Chongqing Institute of Green and Intelligent Technology, Chinese Academy of Sciences, Chongqing 400714, P. R. China.

<sup>b</sup> College of Resources and Environment, University of Chinese Academy of Sciences, Beijing 100049, P. R. China

<sup>c</sup> College of Advanced Interdisciplinary Studies & Hunan Provincial Key Laboratory of Novel Nano-Optoelectronic Information Materials and Devices, National University of Defense Technology, Changsha 410073, P. R. China

<sup>d</sup> School of Pharmaceutical Sciences, Universiti Sains Malaysia, Penang 11800, Malaysia

\* Corresponding Author: Wei Zhang, E-mail: andyzhangwei@163.com.

### S 1.1. AEF calculation

Analytical enhancement factor (AEF) which is defined as the ratio of SERS intensity and normal Raman intensity of a sample.

$$AEF = \frac{I_{SERS}}{I_{Raman}} \times \frac{N_{Raman}}{N_{SERS}} \quad (1)$$

Where  $I_{SERS}$  and  $I_{Raman}$  are the Raman intensity of the sample under the corresponding detection mode.  $N_{SERS}$  and  $N_{Raman}$  are the numbers of adsorbed R6G molecules which are excited by the laser under SERS and normal Raman detection conditions, calculated by equation (2).<sup>1, 2</sup>

$$N = \pi \left( \frac{d}{2} \right)^2 h \cdot C \cdot N_A \quad (2)$$

Where  $N_A$  is the Avogadro constant, 'd' and 'h' are the diameter and height of the laser spot, respectively. C is the concentration of R6G solution detected by SERS and normal Raman. Under the same laser conditions, the parameters 'd' and 'h' will remain the same, so the calculation formula of AEF can be simplified as equation (3):

$$AEF = \frac{I_{SERS}}{I_{RS}} \times \frac{C_{RS}}{C_{SERS}} \quad (3)$$

Therefore, when the experimental conditions for measuring Raman spectrum and SERS spectrum are the same, the formula is valid.

The AEF value of the HC5-AgAu to R6G:

The Raman characteristic peak intensity at  $610 \text{ cm}^{-1}$  was used to obtain AEF for the HC5-AgAu substrate, using the clean  $\text{SiO}_2$  as the reference substrate. The reference concentration of R6G was determined at  $10^{-13} \text{ M}$  for  $C_{SERS}$  and  $10^{-3} \text{ M}$  for  $C_{Raman}$ .

$$AEF = \frac{I_{SERS}}{I_{RS}} \times \frac{C_{RS}}{C_{SERS}} = 6.08 \times 10^9$$

The AEF value of the HC5-AgAu to TPhT:

The Raman characteristic peak intensity at 655 cm<sup>-1</sup> was used to obtain AEF for the HC5-AgAu substrate, using the clean ITO as the reference substrate. The reference concentration of TPhT was determined at 10<sup>-10</sup> M for C<sub>SERS</sub> and 10<sup>-3</sup> M for C<sub>Raman</sub>.

$$AEF = \frac{I_{SERS}}{I_{RS}} \times \frac{C_{RS}}{C_{SERS}} = 3.38 \times 10^6$$

### **S 1.2. Reference substrate treatment process**

The clean SiO<sub>2</sub> and ITO substrates were obtained by ultrasonically treatment with acetone, ethanol and deionized water in sequence. Then stored with deionized water, and dried with nitrogen before using.

### **S 1.3. DFT simulation**

The initial structure diagram of TPhT molecule was drawn with GaussView6.0, then calculated and optimized under Density functional theory (DFT) theory. The basis set of Raman spectroscopy simulation was selected according to the structure and elements of TPhT. Among them, the non-metal elements C, H, Cl were at the B3LYP/6-311+G\*\* level, and the main group metal element Sn used the SDD basis set for simulation calculation. The solvent model in the calculation process was set as the methanol solvent.<sup>3</sup> In addition, the frequency correction factor (0.9887)<sup>4</sup> were also considered in the calculation of Raman spectrum to obtain the accurate resonant frequency.

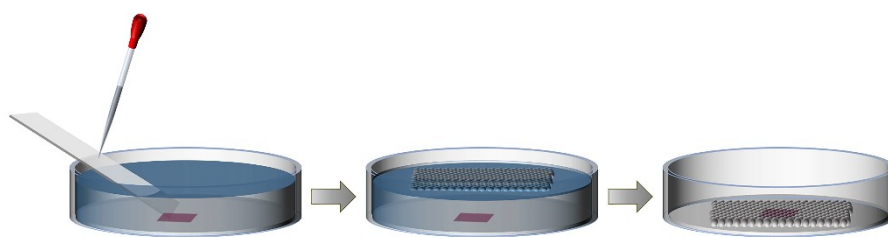

**Figure S1.** The schematic illustration of the PS array preparation.

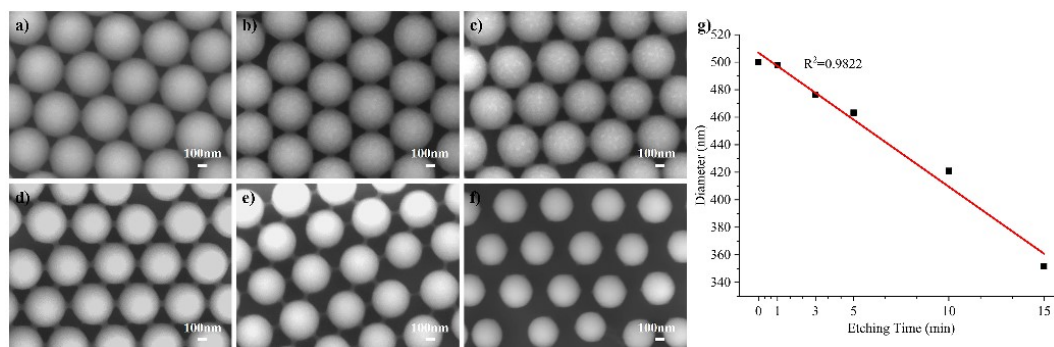

**Figure S2.** a-f) SEM images of PS at etching time of 0, 1, 3, 5, 10, 15 min, respectively, g).

Linear relation graph of PS particle size and etching time.

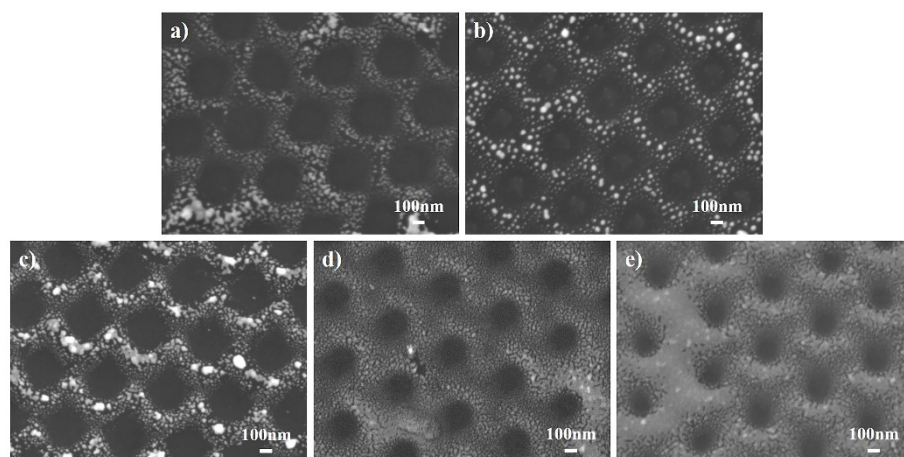

**Figure S3.** SEM images of honeycomb-like Ag arrayed structure at different etching time: a-  
e) 1, 3, 5, 10, 15 min, respectively.

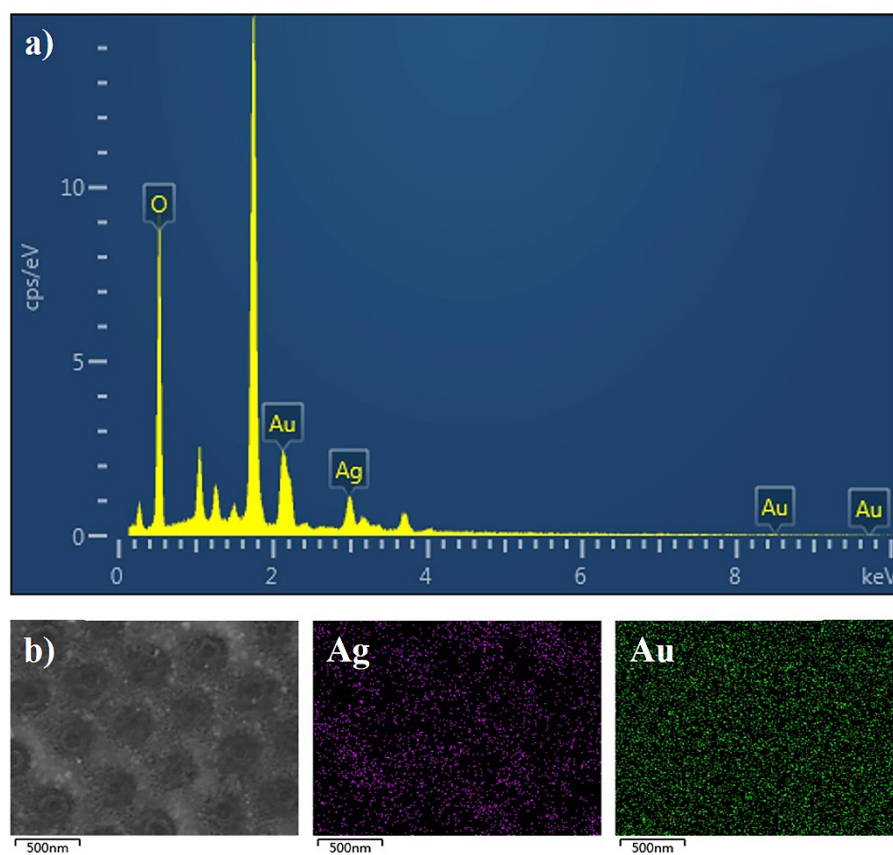

**Figure S4.** a) EDS analysis of HC5-AgAu substrates, b) EDS mapping results of HC5-AgAu substrates.

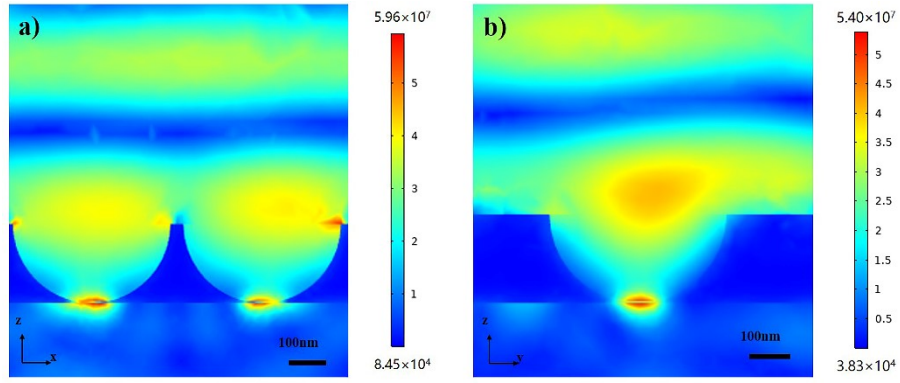

**Figure S5.** a). Electromagnetic field distribution of the substrate HC5-Ag: the x-z longitudinal section, b). Electromagnetic field distribution of the substrate HC5-Ag: the y-z longitudinal section.

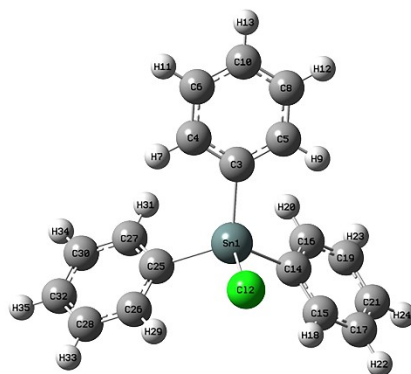

**Figure S6.** Optimization structure of TPbT molecule by DFT theory.

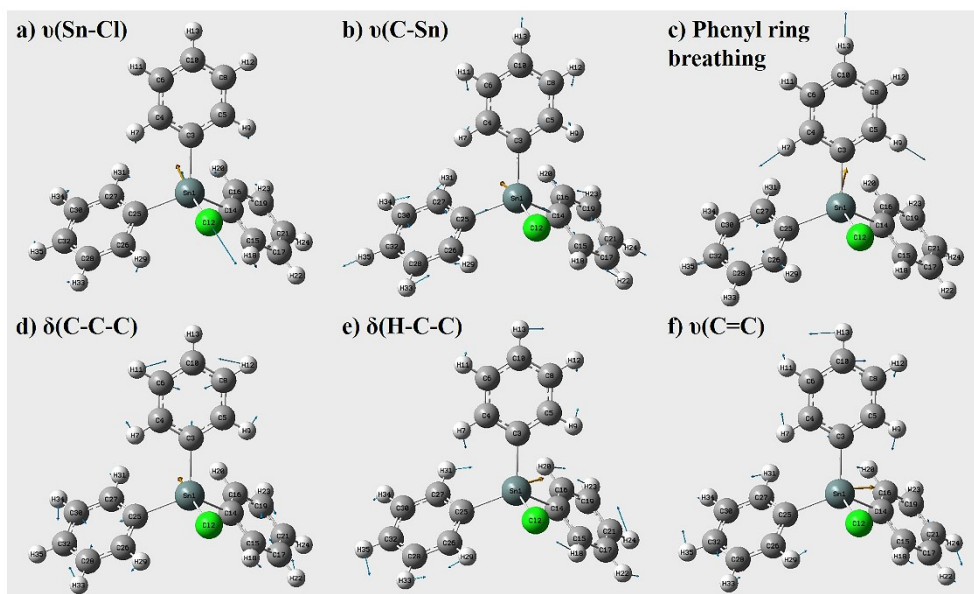

**Figure S7.** Schematic atomic displacements of the main Raman vibration modes of TPhT.

**Table S1.** Attribution of Raman vibration mode of TPhT characteristic peaks.

| Raman<br>(cm <sup>-1</sup> ) | SERS<br>(cm <sup>-1</sup> ) | DFT<br>(cm <sup>-1</sup> ) | Vibration Mode                                 |
|------------------------------|-----------------------------|----------------------------|------------------------------------------------|
| 216                          | 209                         | 196                        | $\tau(\text{C-C-C-C})$                         |
|                              | 235                         | 212                        | $\delta(\text{C-C-Sn})$                        |
| 333                          | 334                         | 276                        | $\nu(\text{Sn-Cl})$                            |
| 620                          | 617                         | 620                        | $\delta(\text{C-C-C})$                         |
| 657                          | 655                         | 652                        | $\nu(\text{C-Sn})$                             |
|                              | 696                         | 700                        | $\tau(\text{H-C-C-C}), \tau(\text{C-C-C-C})$   |
|                              | 734                         | 740                        |                                                |
|                              | 854                         | 852                        |                                                |
|                              | 913                         | 916                        | $\tau(\text{H-C-C-C})$                         |
| 998                          | 999                         | 996                        | symmetric and asymmetric phenyl ring breathing |
| 1022                         | 1022                        | 1012                       |                                                |
|                              | 1075                        | 1068                       | $\delta(\text{C-C-C})$                         |
| 1157                         | 1158                        | 1156                       | $\delta(\text{H-C-C})$                         |
| 1192                         | 1191                        | 1188                       |                                                |
|                              | 1332                        | 1332                       |                                                |
|                              | 1431                        | 1428                       | $\nu(\text{C-C})$                              |
|                              | 1481                        | 1476                       |                                                |
|                              | 1569                        |                            | $\nu(\text{C=C}), \delta(\text{H-C-C})$        |
| 1577                         | 1579                        | 1580                       |                                                |
| 3047                         | 3046                        | 3124                       | $\nu(\text{C-H})$                              |

**Notation:**  $\nu$ , stretching vibrations;  $\delta$ , in-plane deformational vibrations;  $\tau$ , out-of-plane vibrations.

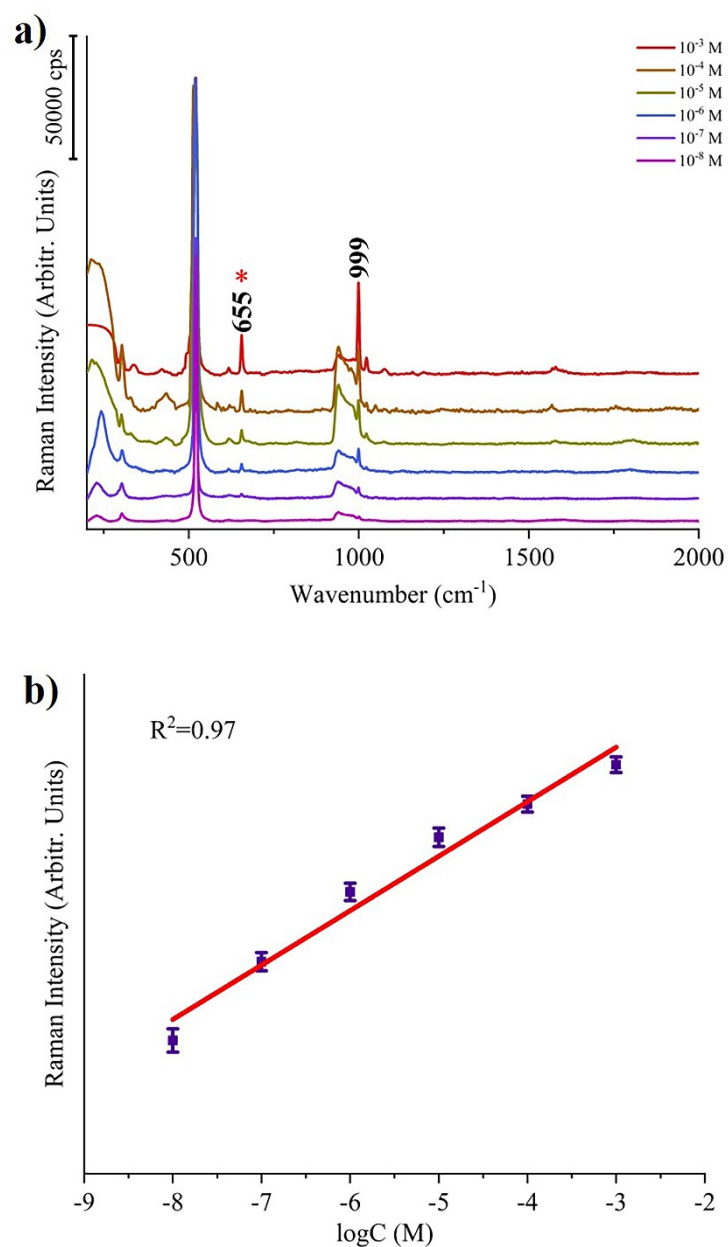

**Figure S8.** a). SERS spectra of TPhT of varying concentrations from  $10^{-3}$  to  $10^{-8}$  M by HC5-Ag substrate; b). Log-log correlation graph of the intensity at 655  $\text{cm}^{-1}$  and TPhT concentrations. The error bar was obtained by three replicated determinations.

## References

1. W. Y. Xie, S. X. He, L. P. Xia, H. Zhang, W. Zhang, Z. X. Shen, X. H. Liu, J. M. Hu, *Anal. Methods*, **2015**, *7*, 1676-1679.
2. Juan C. Fraire, Luis A. Pérez, Eduardo A. Coronado, *Acs Nano*, **2012**, *6*, 3441-3452.
3. D. Pankin, N. Martynova, M. Smirnov, A. Manshina, *Spectrochim. Acta. A Mol. Biomol. Spectrosc.*, **2021**, *245*, 118933.
4. J. P. Merrick, D. Moran, L. Radom, *J. Phys. Chem. A*, **2007**, *111*, 11683-11700.
